# Supplementary material for: Interfacial electric field construction of hollow PdS QDs/Zn1−xCdxS solid solution with enhanced photocatalytic hydrogen evolution
Source: Royal Society of Chemistry journal article supplement (doi:10.1039/d3nr05518c), 2023-12-22
Supplement: d3nr05518c1.pdf [file d3nr05518c1.pdf]

## **Interfacial Electric Field Construction of Hollow PdS QDs/Zn<sub>1-x</sub>Cd<sub>x</sub>S Solid Solution with Enhanced Photocatalytic Hydrogen Evolution**

Cheng Guo<sup>a,+</sup>, Zongyi Huang<sup>b,+</sup>, Xinrui Long<sup>a</sup>, Yuchen Sun<sup>a</sup>, Pengfei Ma<sup>c</sup>, Quanxing Zheng<sup>c</sup>, Hongliang Lu<sup>c</sup>, Xiaodong Yi<sup>b</sup>, Zhou Chen<sup>a,\*</sup>

<sup>a</sup> College of Materials, Xiamen University, Xiamen 361005, China

<sup>b</sup> State Key Laboratory of Physical Chemistry of Solid Surfaces, College of Chemistry and Chemical Engineering, Xiamen University, Xiamen 361005, China

<sup>c</sup> Technology Center, China Tobacco Fujian Industrial Co., Ltd., Xiamen 361021  
China

Corresponding Author

\* E-mail: [zhouchen@xmu.edu.cn](mailto:zhouchen@xmu.edu.cn) (Zhou Chen).

<sup>+</sup> These authors contributed equally to this work.

## 1. Experimental Section

### 1.1 Chemicals

Zinc acetate ( $\text{Zn}(\text{CH}_3\text{COO})_2$ , AR,  $\geq 99.0\%$ ), hexamethylenetetramine ( $\text{C}_6\text{H}_{12}\text{N}_4$ , AR,  $\geq 99.0\%$ ), thioacetamide ( $\text{C}_2\text{H}_5\text{NS}$ , AR,  $\geq 98.0\%$ ), palladium chloride dihydrate ( $\text{H}_2\text{PdCl}_2 \cdot 2\text{H}_2\text{O}$ , AR,  $\geq 98.0\%$ ), cadmium (II) acetate dihydrate ( $\text{Cd}(\text{CH}_3\text{COO})_2 \cdot 2\text{H}_2\text{O}$ , AR,  $\geq 98.0\%$ ), thiourea ( $\text{CH}_4\text{N}_2\text{S}$ , AR,  $\geq 99.0\%$ ), anhydrous sodium sulfate ( $\text{Na}_2\text{SO}_4$ , AR,  $\geq 99.0\%$ ), ethanol ( $\text{CH}_3\text{CH}_2\text{OH}$ , AR,  $\geq 99.7\%$ ), lactic acid ( $\text{C}_3\text{H}_6\text{O}_3$ , AR,  $\geq 85.0\%$ ) were purchased from Sinopharm Chemical Reagent. 5,5-Dimethyl-1-pyrrolene-N-oxide (DMPO, AR,  $\geq 97\%$ ) was purchased from Aladdin. Nafion binder (5 wt.%, AR, DuPont520) was purchased from Sinero. All chemicals were used without further purification.

### 1.2 Synthesis of hexagonal ZnO.

Typically,  $\text{Zn}(\text{Ac})_2$  (2 mmol) and hexamethylenetetramine (2 mmol) were added into 100 mL mixed ethanol aqueous solution (30%vol). The solution was then refluxed at 90 °C for 2 h. The white precipitates were collected by centrifugation and washed with water and ethanol for both 2 times. At last, the products were dried at 60 °C under vacuum overnight.

### 1.3 Synthesis of hollow ZnS.

The as-prepared 100 mg ZnO hexagonal particles were first dispersed in 40 mL of ethanol by sonication for 20 min. Then, 300 mg of thiourea was added into the 40 mL dispersion. The as-obtained solution was transferred into a Teflon-lined stainless-steel autoclave and heated at 180 °C in an oven for 24 h. The precipitates were harvested by centrifugation and washed with water and ethanol for both 2 times. Then it's dried at 60 °C under vacuum overnight.

### 1.4 Synthesis of $\text{Zn}_{1-x}\text{Cd}_x\text{S}$ solid solution.

A series of  $Zn_{1-x}Cd_xS$  solid solution were synthesized, where  $x$  ( $x=0.2, 0.4, 0.6, 0.8, 1.0$ ) represents the amount of substance ratio of  $Cd^{2+}$  to  $S^{2-}$ . Take the synthesis of  $Zn_{0.6}Cd_{0.4}S$  solid solution as an example, first, 50 mg hollow ZnS were dispersed in 30 mL  $H_2O$  by sonication for 10 min. Then 4.10 mL  $CdCl_2 \cdot 2H_2O$  aqueous solution (0.10 M) was added in the dispersion. Third, the as-obtained solution was transferred into a Teflon-lined stainless-steel autoclave and heated at 160 °C in an oven for 24 h. Finally, the product was filtered, washed with water and ethanol for both 2 times, and dried at 60 °C under vacuum overnight. The synthesis process of other ratio of  $Cd^{2+}$  to  $S^{2-}$  is similar to the  $Zn_{0.6}Cd_{0.4}S$ , except for the usage amount of  $Cd^{2+}$ .

### **1.5 Synthesis of PdS QDs/ $Zn_{1-x}Cd_xS$ heterojunction.**

A series of nwt% PdS QDs/ $Zn_{1-x}Cd_xS$  composites were constructed, where  $n$  ( $n=0.1, 0.3, 0.5, 1, 3, 5$ ) represents the weight ratio of PdS QDs to  $Zn_{1-x}Cd_xS$  which has the best HER performance. Take the synthesis of 0.5wt% PdS QDs/ $Zn_{1-x}Cd_xS$  composite as an example, typically, 50 mg of  $Zn_{1-x}Cd_xS$  solid solution and 30 mL of ethanol were added into a 50 mL glass vial. Then, add 235  $\mu$ L  $H_2PdCl_2 \cdot 2H_2O$  aqueous solution (0.01 M) and 235  $\mu$ L TAA aqueous solution (0.01 M) into the vial, maintained at 80 °C for 60 min. Finally, the product was filtered, washed with water and ethanol for both 2 times, and dried at 60 °C under vacuum overnight. The synthesis process of other nwt% PdS QDs/ $Zn_{1-x}Cd_xS$  composites is similar to the 0.5wt% PdS QDs/ $Zn_{1-x}Cd_xS$  composite, except for the usage amount of  $Pd^{2+}$  and TAA.

### **1.6 Characterization**

The crystalline phases of samples were analyzed by X-ray diffractometer (XRD, SmartLab-SE, Rigaku) with Cu  $K\alpha$  radiation (15 mA, 35 kV, and  $k = 0.15406$  nm). The microstructures of samples were performed by field-emission scanning electron microscope (SEM, Hitachi S-4800) with an accelerating voltage of 15 kV and

transmission electron microscope (TEM, Tecnai F30) equipped with an energy dispersive X-ray spectroscopy (EDX) system. The microscope was operated at an acceleration voltage of 200 kV, which determines the energy of the transmitted electrons. X-ray photoelectron spectroscopy (XPS) was detected by Thermo Scientific ESCALAB Xi<sup>+</sup> equipped with Al K<sub>α</sub> radiation at 1486.6 eV. The ultraviolet visible (UV-vis) diffuse reflectance spectra (DRS) were acquired using a Varian-Cary 5000 spectrometer with BaSO<sub>4</sub> as a reference substance. Steady-state photoluminescence (PL) was recorded on a Hitachi F-7000 spectrophotometer with an excitation wavelength of 390 nm. Time-resolved photoluminescence (TRPL) spectra were obtained using an Edinburgh Instruments FLS980 fluorescence.

### **1.7 Electrochemical measurement**

The photoelectrochemical experiments were conducted using an electrochemical workstation (CHI 760E, Shanghai Chenhua) in a standard three-electrode reaction cell. The counter electrode was a platinum plate, while the reference electrode was an Ag/AgCl electrode. The working electrode was prepared as follows: 10 mg of the sample was dispersed in 500 μL ethanol, 450 μL ultrapure water and 50 μL Nafion solution to form a suspension. Then, 50 μL of the suspension was coated onto a 1 cm × 1 cm FTO plate and dried at 60 °C. Photocurrent measurements were performed in a 0.1 M Na<sub>2</sub>SO<sub>4</sub> solution under visible-light irradiation from a 300 W xenon light source. Electrochemical impedance spectra (EIS) and linear sweep voltammetry (LSV) were also carried out in a 0.1 M Na<sub>2</sub>SO<sub>4</sub> aqueous solution.

### **1.8 Electron spin resonance radical trapping experiments**

The electron spin resonance (ESR) spectra were acquired using a Bruker EMX-10/12 ESR spectrometer. The trapping experiments were performed as follows: 10 mg of synthetic samples were dispersed in 5 mL of ultrapure water 10 mM of DMPO,

using ultrasonication to form a mixed solution. Subsequently, the mixed suspension was injected into an ESR detector tube. It was then exposed to Xe lamp irradiation for 5 minutes. Afterward, ESR spectroscopy experiments were performed at room temperature. This solution was subjected to in situ ESR measurements to capture  $\bullet\text{OH}$  species.

### **1.9 Computational methods**

First-principle calculation of density of functional theory (DFT) was operated based on the Cambridge Sequential Total energy Package (CASTEP)<sup>1</sup>. The exchange correlation interaction between electron and atomic nucleus was conducted by Perdew-Burke-Ernzerhof (PBE) functional of generalized gradient approximation (GGA) method. Grimme's DFT-D scheme was used to correct the van der Waals (vdW) dispersion. The calculation was operated on a  $4\times 4\times 1$  supercell of  $\text{Zn}_{0.6}\text{Cd}_{0.4}\text{S}$  and for 0.5wt% PdS QDs/ $\text{Zn}_{0.6}\text{Cd}_{0.4}\text{S}$  one of Zn atoms was displaced by a Pd atom. During the geometry optimization,  $2\times 2\times 4$  Monkhorst-Pack k-point grid is employed. The energy cutoff was 560.50 eV. Moreover, the select convergence tolerance of  $1.0\times 10^{-5}$  eV/atom for energy, 0.03 eV/Å for maximum force, 0.05 GPa for maximum stress, 0.001 Å for maximum displacement and  $1.0\times 10^{-6}$  eV/atom for self-consistent field (SCF).

### **1.10 Photocatalytic performance evaluation**

The photocatalytic  $\text{H}_2$  evolution performance was tested in follows: 10 mg of the photocatalysts were introduced into a sealed tube reactor with a diameter of 16 mm and volume of 20 mL. The reactor contained 9 mL of ultrapure water and 1 mL of lactic acid, which were subjected to ultrasonication to ensure proper mixing and filled with argon for 5 min. Subsequently, visible-light irradiation was applied using a 300 W xenon lamp with a cut-off filter ( $\lambda > 420$  nm) in 2 h irradiation.  $\text{H}_2$  evolution

amount was analyzed by Agilent 7890 A gas chromatography with a thermal conductivity detector.

The testing of photocatalytic stability is mainly divided into the following steps. Firstly, perform photocatalytic activity testing according to the above steps; After completing the first test cycle, recorded H<sub>2</sub> amount and recycled all the catalysts by centrifugation, and label the test results as Cycle 1. Finally, repeat the above steps with the collected catalyst to obtain the following cyclic test data.

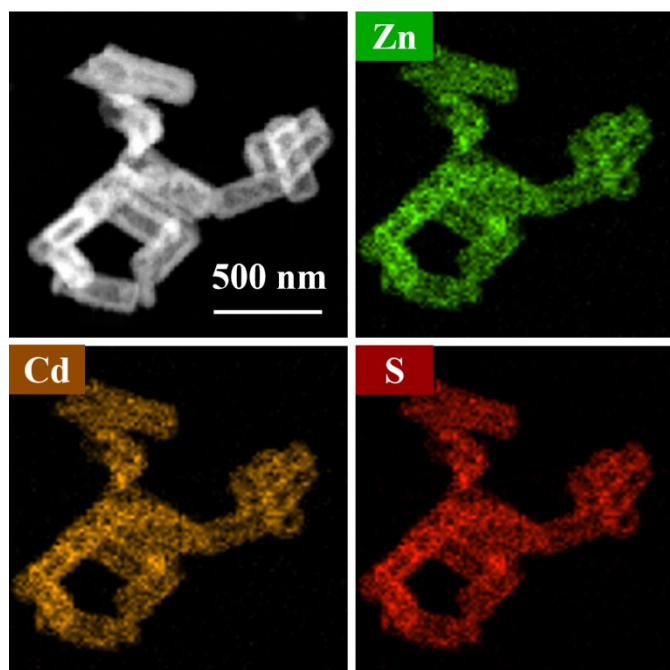

**Fig. S1** Corresponding EDX elemental mapping images of the Zn<sub>0.6</sub>Cd<sub>0.4</sub>S sample.

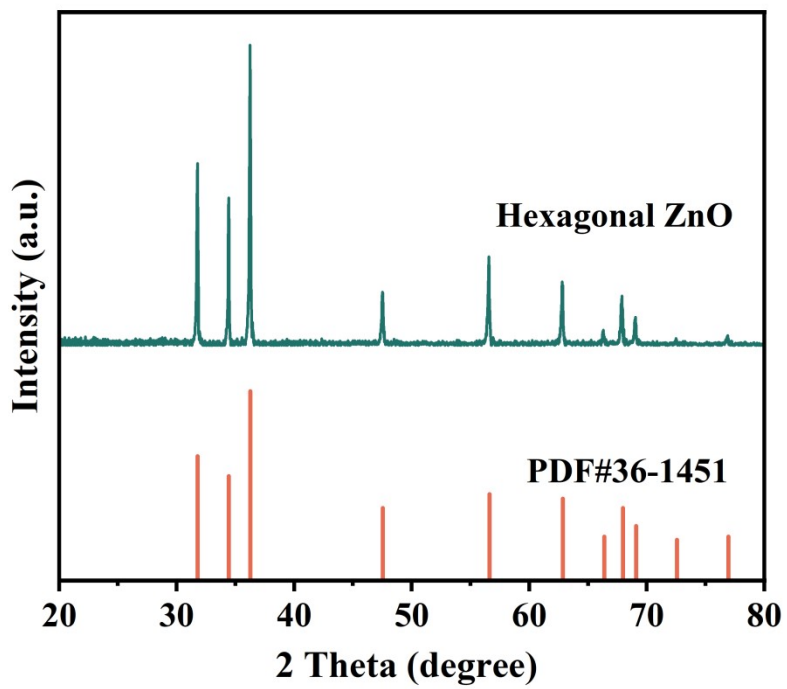

Fig. S2 XRD pattern of hexagonal ZnO.



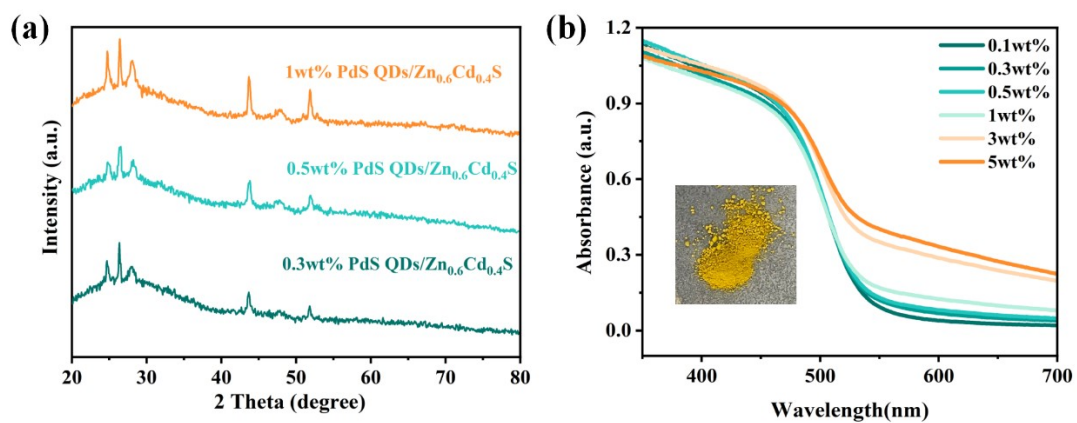

**Fig. S3** (a) XRD patterns and (b) UV-vis DRS absorption plots of different loading amount of PdS QDs on Zn<sub>0.6</sub>Cd<sub>0.4</sub>S solid solution (the insert is the digital image of 0.5wt% PdS QDs/Zn<sub>0.6</sub>Cd<sub>0.4</sub>S sample).

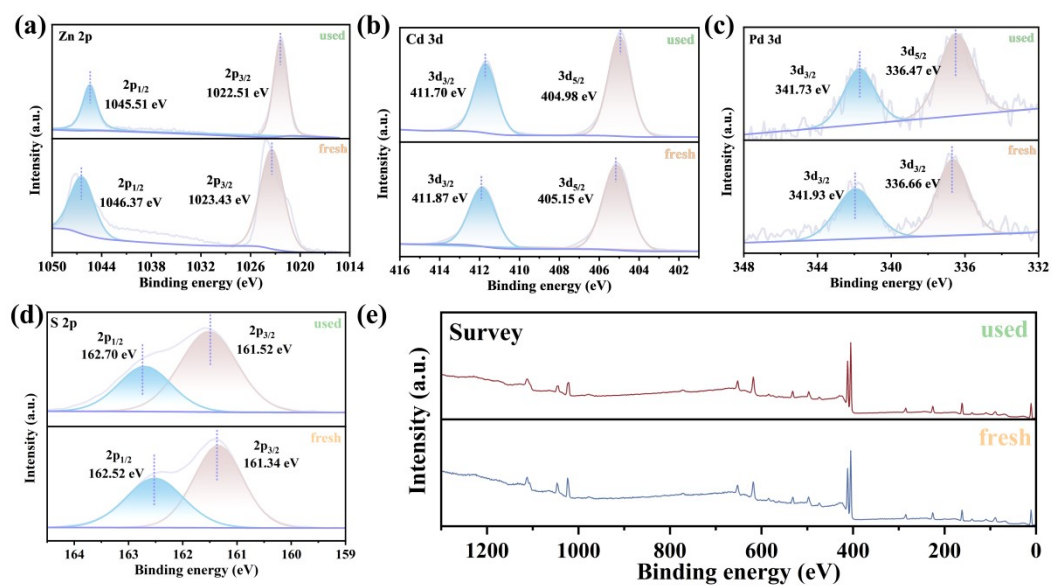

**Fig. S4** (a) Zn 2p, (b) Cd 3d, (c) Pd 3d, and (d) S 2p of XPS pattern for 0.5wt% PdS QDs/Zn<sub>0.6</sub>Cd<sub>0.4</sub>S composite before and after photocatalytic reaction.

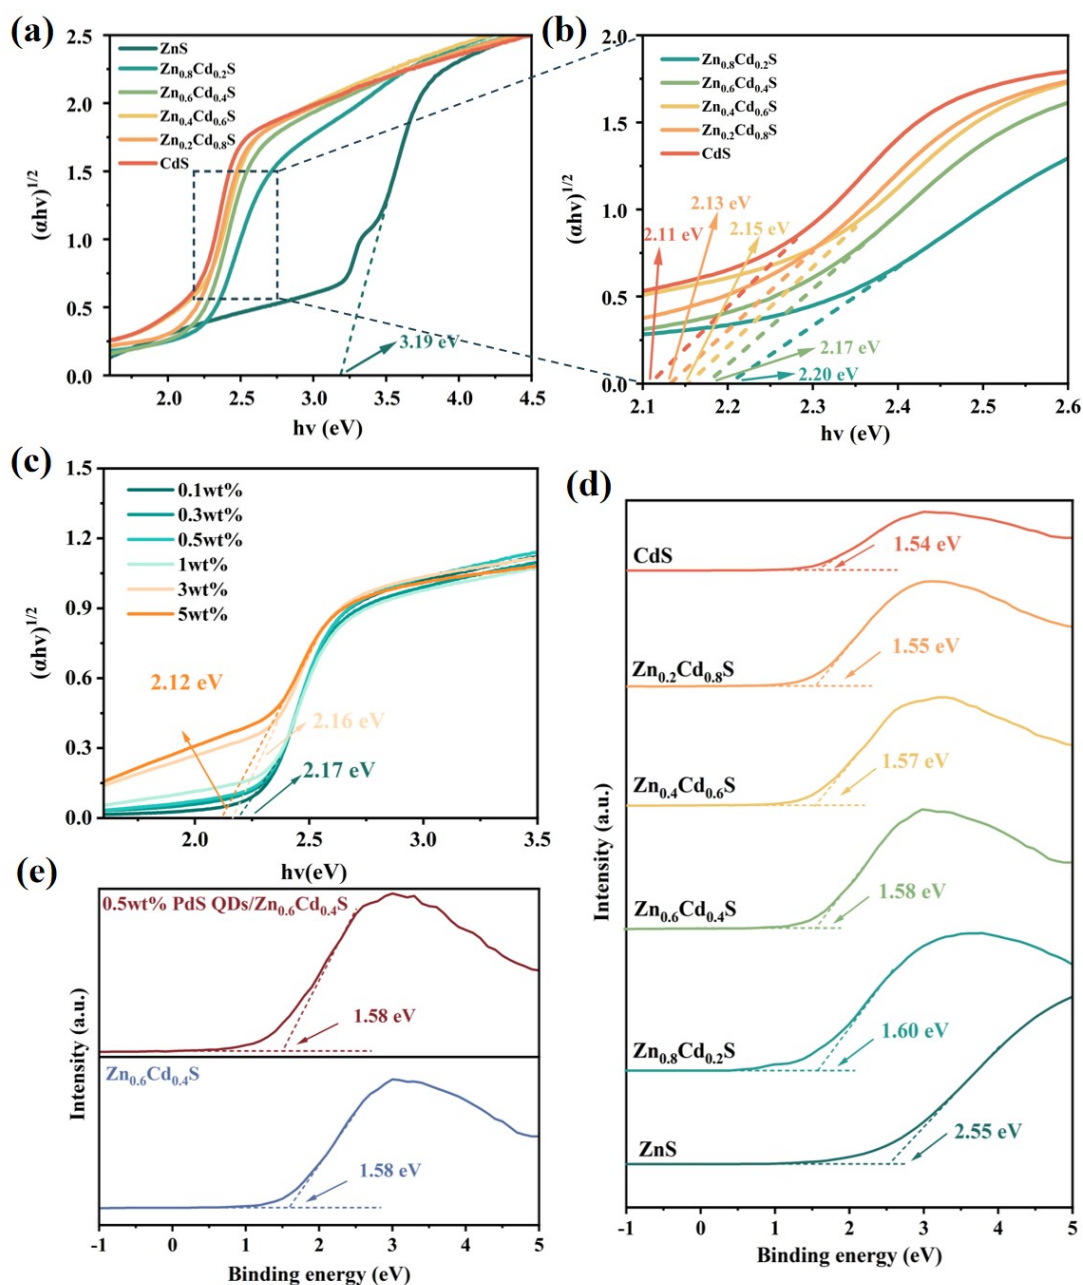

**Fig. S5**  $(\alpha h\nu)^{1/2}$  vs.  $h\nu$  plots by Kubelka-Munk of (a, b) Zn<sub>1-x</sub>Cd<sub>x</sub>S solid solution and (c) nwt% PdS QDs/Zn<sub>0.6</sub>Cd<sub>0.4</sub>S. (c) Valence band XPS of (d) Zn<sub>1-x</sub>Cd<sub>x</sub>S solid solution and (e) 0.5wt% PdS QDs/Zn<sub>0.6</sub>Cd<sub>0.4</sub>S.

**Table S1** EDS results of Cd: (Cd+Zn) ratio in  $Zn_{1-x}Cd_xS$  samples.

| Catalysts           | Atoms ratio of Cd: (Zn+Cd) |              |
|---------------------|----------------------------|--------------|
|                     | Theoretical                | Experimental |
| ZnS                 | 0%                         | 0%           |
| $Zn_{0.8}Cd_{0.2}S$ | 20.00%                     | 22.90%       |
| $Zn_{0.6}Cd_{0.4}S$ | 40.00%                     | 38.83%       |
| $Zn_{0.4}Cd_{0.6}S$ | 60.00%                     | 60.42%       |
| $Zn_{0.2}Cd_{0.8}S$ | 80.00%                     | 76.92%       |
| CdS                 | 100.00%                    | 98.92%       |

**Table S2.** The corresponding binding energy positions of ZnS, CdS, Zn<sub>0.6</sub>Cd<sub>0.4</sub>S, 0.5wt% PdS QDs/Zn<sub>0.6</sub>Cd<sub>0.4</sub>S, used 0.5wt% PdS QDs/Zn<sub>0.6</sub>Cd<sub>0.4</sub>S.

| Binding energy<br>(eV)                                       | Cd 3d <sub>3/2</sub> | Cd 3d <sub>5/2</sub> | S 2p <sub>1/2</sub> | S 2p <sub>3/2</sub> | Zn 2p <sub>1/2</sub> | Zn 2p <sub>3/2</sub> | Pd 3d <sub>1/2</sub> | Pd 3d <sub>3/2</sub> |
|--------------------------------------------------------------|----------------------|----------------------|---------------------|---------------------|----------------------|----------------------|----------------------|----------------------|
| ZnS                                                          | -                    | -                    | 162.20              | 160.90              | 1044.40              | 1021.30              | -                    | -                    |
| CdS                                                          | 410.29               | 403.56               | 161.16              | 159.96              | -                    | -                    | -                    | -                    |
| Zn <sub>0.6</sub> Cd <sub>0.4</sub> S                        | 411.79               | 405.06               | 162.74              | 161.55              | 1045.08              | 1022.07              | -                    | -                    |
| 0.5wt% PdS QDs<br>/Zn <sub>0.6</sub> Cd <sub>0.4</sub> S     | 411.87               | 405.15               | 162.70              | 161.52              | 1046.37              | 1023.43              | 341.93               | 336.66               |
| used 0.5wt% PdS<br>QDs/Zn <sub>0.6</sub> Cd <sub>0.4</sub> S | 411.7                | 404.98               | 162.52              | 161.34              | 1045.51              | 1022.51              | 341.73               | 336.47               |

**Table S3.** Comparison of photocatalytic hydrogen evolution performance of different sulfide catalysts respectively.

| Materials                                                          | H <sub>2</sub> evolution                     |                                    | Sacrificial reagent                               | Ref.      |
|--------------------------------------------------------------------|----------------------------------------------|------------------------------------|---------------------------------------------------|-----------|
|                                                                    | rate (mmol g <sup>-1</sup> h <sup>-1</sup> ) | Light source                       |                                                   |           |
| Ni/ZCS (6%)                                                        | 31                                           | 300W Xe lamp UV irradiation(>420)  | Na <sub>2</sub> S/Na <sub>2</sub> SO <sub>3</sub> | 2         |
| 0.5wt% PdS QDs/Zn <sub>0.6</sub> Cd <sub>0.4</sub> S               | 27.6                                         | 300W Xe lamp UV irradiation(>420)  | Lactic Acid                                       | This Work |
| BP-Pt/CdS nanospheres                                              | 24.17                                        | 300W Xe lamp UV irradiation(>420)  | Lactic Acid                                       | 3         |
| <u>CdS@ZnNi-C</u>                                                  | 15.7                                         | 300W Xe lamp (at 420)              | Na <sub>2</sub> S/Na <sub>2</sub> SO <sub>3</sub> | 4         |
| CdS frame-in-cage                                                  | 13.6                                         | 300W Xe lamp (>400)                | Na <sub>2</sub> S/Na <sub>2</sub> SO <sub>3</sub> | 5         |
| Hollow Zn <sub>0.6</sub> Cd <sub>0.4</sub> S dodecahedral Cage     | 5.68                                         | 300W Xe lamp UV irradiation (>420) | Na <sub>2</sub> S/Na <sub>2</sub> SO <sub>3</sub> | 6         |
| Ag <sub>2</sub> S@CdS/ZnS                                          | 3.76                                         | 300W Xe lamp (420~800)             | Na <sub>2</sub> S/Na <sub>2</sub> SO <sub>3</sub> | 7         |
| ZnIn <sub>2</sub> S <sub>4</sub> /Mo <sub>2</sub> TiC <sub>2</sub> | 3.12                                         | 300W Xe lamp UV irradiation (>420) | TEOA                                              | 8         |
| OFH-CZt                                                            | 3.072                                        | 300W Xe lamp (320~780)             | Na <sub>2</sub> S/Na <sub>2</sub> SO <sub>3</sub> | 9         |
| RGO-Zn <sub>0.8</sub> Cd <sub>0.2</sub> S                          | 1.824                                        | AM 1.5G                            | Na <sub>2</sub> S/Na <sub>2</sub> SO <sub>3</sub> | 10        |
| VZIS/NWO-5                                                         | 1.781                                        | 300W Xe lamp UV irradiation (>420) | TEOA                                              | 11        |
| CoS <sub>x</sub> /g-C <sub>3</sub> N <sub>4</sub>                  | 0.629                                        | 350W Xe lamp (>400)                | TEOA                                              | 12        |
| CdS/Bi <sub>2</sub> S <sub>3</sub> -V <sub>s</sub>                 | 0.54                                         | 300W Xe lamp                       | Na <sub>2</sub> S/Na <sub>2</sub> SO <sub>3</sub> | 13        |

**Table S4.** The values of  $R_{ct}$  from EIS spectra (Fig. 5b)

| Samples               | ZnS  | CdS  | $Zn_{0.6}Cd_{0.4}S$ | 0.5wt% PdS QDs/ $Zn_{0.6}Cd_{0.4}S$ |
|-----------------------|------|------|---------------------|-------------------------------------|
| $R_{ct}$ ( $\Omega$ ) | 3652 | 2451 | 1256                | 999                                 |

## Reference

1. S. J. Clark, M. D. Segall, C. J. Pickard, P. J. Hasnip, M. I. Probert, K. Refson and M. C. Payne, *Z. Krist-Cryst. Mater.* 2005, **220**, 567-570.
2. H. She, Y. Sun, S. Li, J. Huang, L. Wang, G. Zhu and Q. Wang, *Appl. Catal. B- Environ.* 2019, **245**, 439-447.
3. R. Feng, K. Wan, X. Sui, N. Zhao, H. Li, W. Lei, J. Yu, X. Liu, X. Shi, M. Zhai, G. Liu, H. Wang, L. Zheng and M. Liu, *Nano Today*, 2021, **37**, 101080.
4. L. Xue, Y. Shi, C. Huang, Q. Wu, B. Chen and W. Yao, *J. Colloid Interf. Sci.* 2023, **635**, 72-82.
5. P. Zhang, D. Luan and X. W. Lou, *Adv. Mater.* 2020, **32**, 2004561.
6. J. Chen, J. Chen and Y. Li, *J. Mater. Chem. A*, 2017, **5**, 24116-24125.
7. F. Zhao, Y. L. Law, N. Zhang, X. Wang, W. Wu, Z. Luo and Y. Wang, *Small*, 2023, **19**, 2208266.
8. Q. Xi, F. Xie, J. Liu, X. Zhang, J. Wang, Y. Wang, Y. Wang, H. Li, Z. Yu, Z. Sun, X. Jian, X. Gao, J. Ren, C. Fan and R. Li, *Small*, 2023, **19**, 2300717.
9. Y. Zhu, J. Chen, L. Shao, X. Xia, Y. Liu and L. Wang, *Appl. Catal. B- Environ.* 2020, **268**, 118744.
10. J. Zhang, J. Yu, M. Jaroniec and J. R. Gong, *Nano Lett.* 2012, **12**, 4584-4589.
11. M. Zhang, P. Tan, L. Yang, H. Zhai, H. Liu, J. Chen, R. Ren, X. Tan and J. Pan, *J. Colloid Inter. Sci.* 2023, **634**, 817-826.
12. J. Fu, C. Bie, B. Cheng, C. Jiang and J. Yu, *ACS Sustain. Chem. Eng.* 2018, **6**, 2767-2779.
13. M. Li, H. Yao, S. Yao, G. Chen and J. Sun, *J. Colloid Inter. Sci.* 2023, **630**, 224-234.
